# Supplementary material for: Identification and analysis of spinal cord injury subtypes using weighted gene co-expression network analysis
Source: PubMed Central journal article supplement — Ann Transl Med. 2021 Mar;9(6):466. doi: 10.21037/atm-21-340 (PMC8039699; doi:10.21037/atm-21-340), 2021-03
Supplement: atm-09-06-466-supplementary.pdf [file atm-09-06-466-supplementary.pdf]

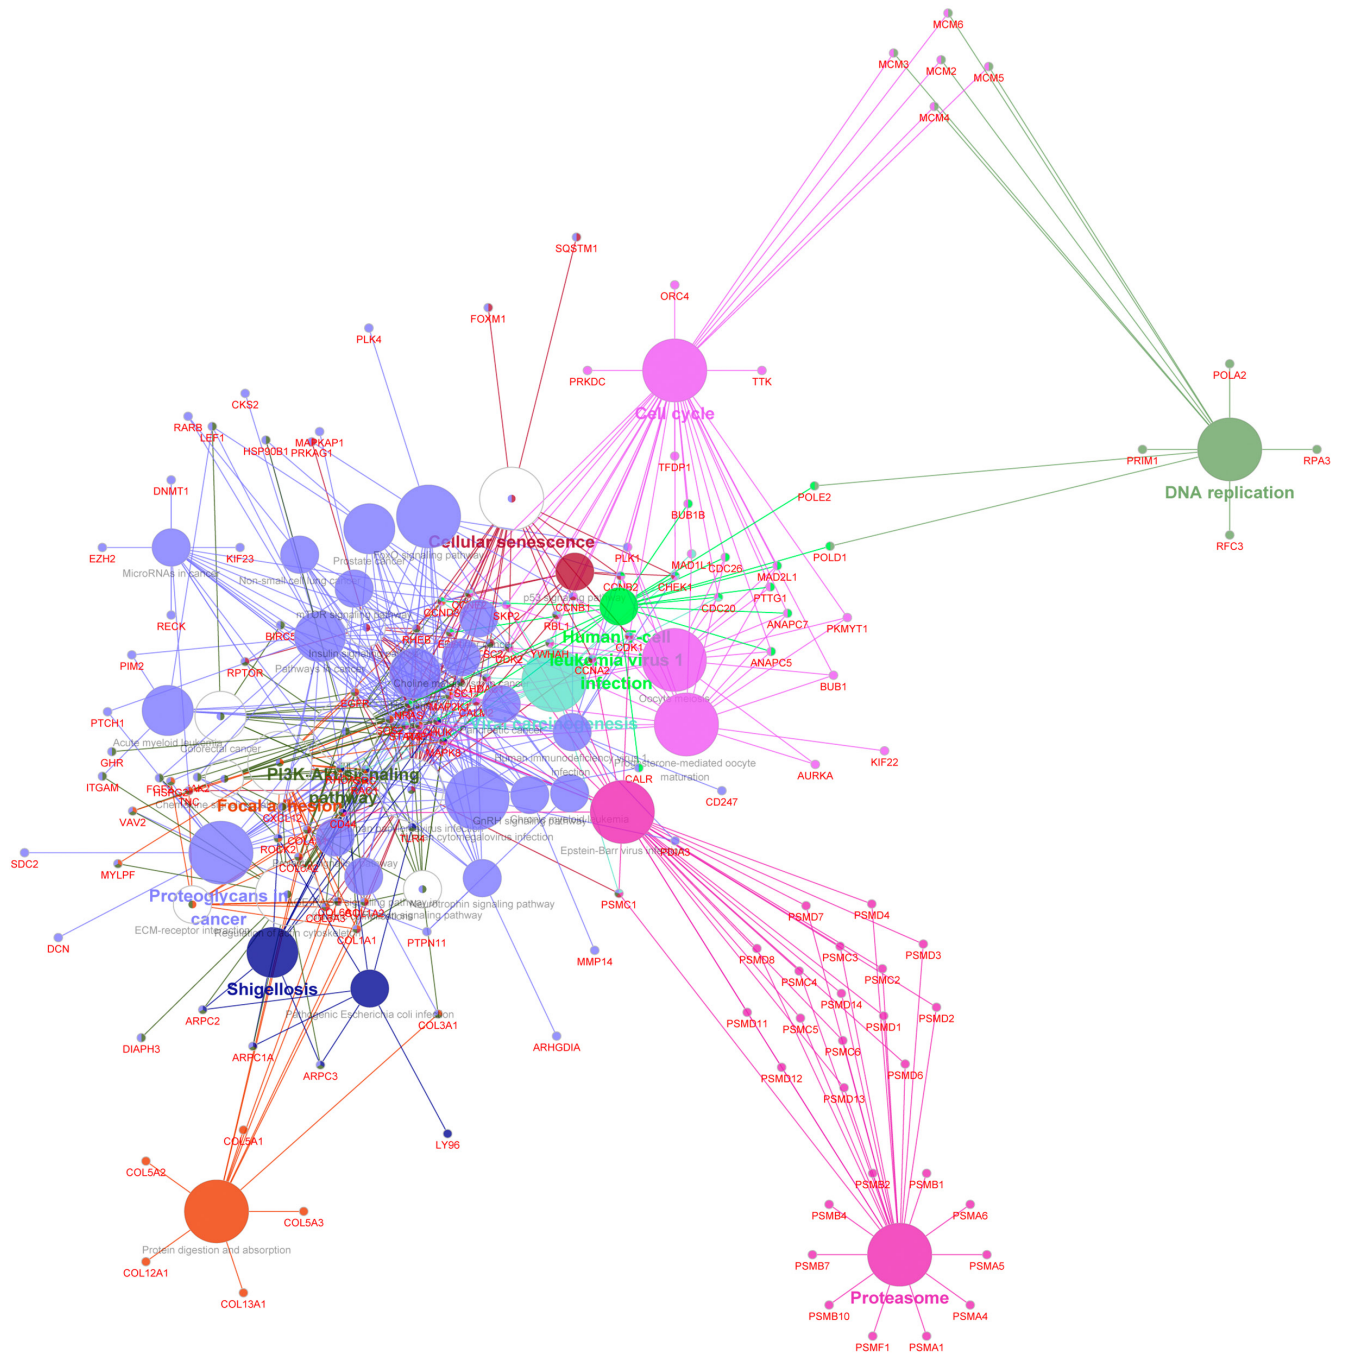

Figure S1 The annotation of the turquoise and brown module co-expression networks in the KEGG Pathway.



## Importance of Candidates

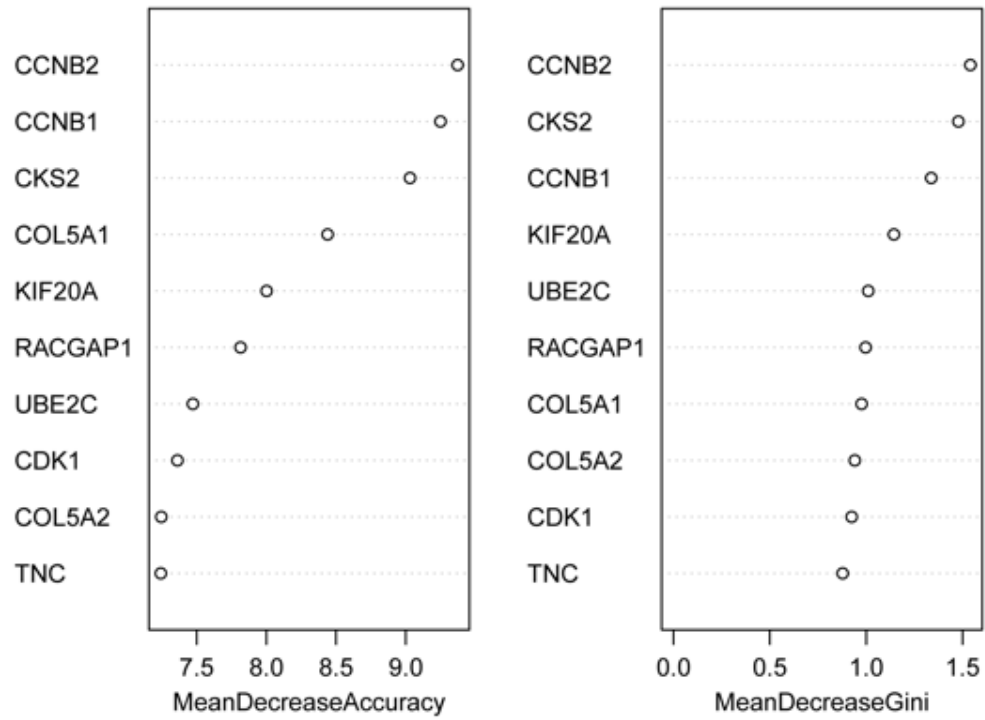

**Figure S4** The significance of these 10 genes for different subtypes of SCI based on the random forest model.
